# Supplementary material for: BOLD-CSF dynamics assessed using real time phase contrast CSF flow interleaved with cortical BOLD MRI
Source: Research Square preprint supplement (doi:10.21203/rs.3.rs-4964358/v1), 2024-11-05

**Supplementary:**

**Figure S1: Comparison of gBOLD of 9 slices BOLD scan (dark blue) to 21 slices BOLD scan (light blue).**

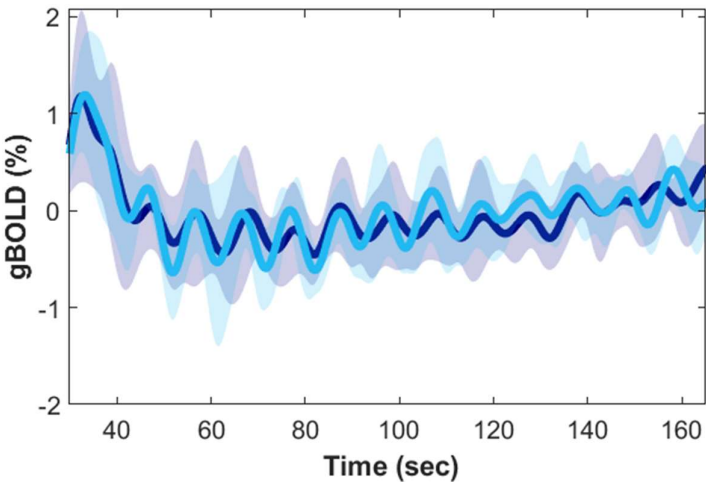

**Figure S2: CSF power spectra. Unfiltered version of Figure 3B). showing the cardiac peak.**

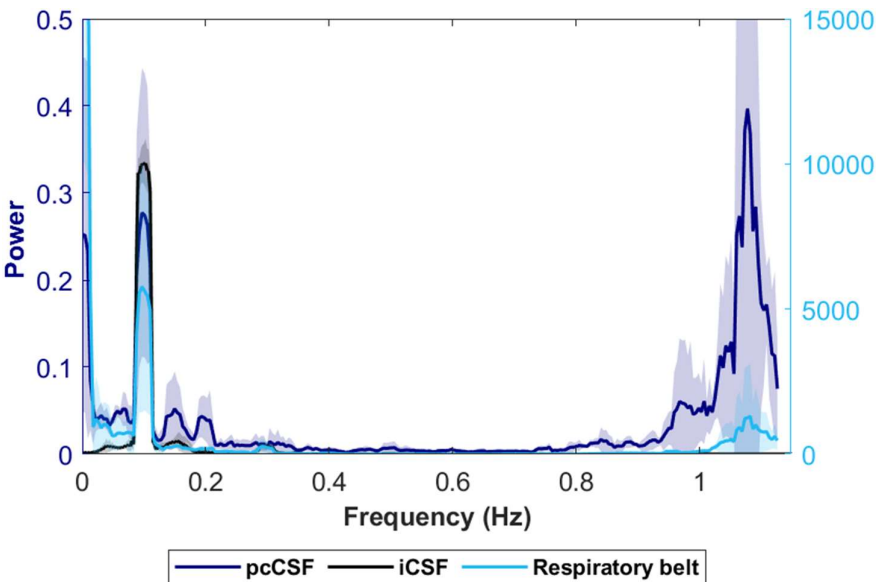

Supplement: Supplementary file [file 2b7dab449f3b7b2b19e135b7.pdf]
